# Supplementary material for: Studies on the Use of Flagellin as an Immunostimulant and Vaccine Adjuvant in Fish Aquaculture
Source: PubMed Central journal article supplement (PMC6333709; doi:10.3389/fimmu.2018.03054), 2019-01-09
Supplement: Data_Sheet_1.pdf [file Data_Sheet_1.pdf]

## Supplementary materials:

### Studies on the use of flagellin as an immunostimulant and vaccine adjuvant in fish aquaculture

Eakapol Wangkahart, Christopher J. Secombes and Tiehui Wang

**Figure S1** A multiple alignment of recombinant *Y. ruckeri* flagellin (YRF) and its muteins YRF-N, YRF-C and YRF-NC.

**Table S1** Primers used for real-time PCR analysis of gene expression

**Table S2** Fold change of transcript expression of immune-relevant genes in the spleen, liver, gills and skin of fish ip injected with YRF.

```

YRF      MGA VINTNSLSLLTQNNLNK SQGSLGTAIERLSSGLRINS AKDDAAGQAIANRFTSNING 60
YRF-NC  MGA VINTNSLSLLTQNNLNK SQGSLGTAIERLSSGLRINS AKDDAAGQAIANRFTSNING 60
YRF-N   MGA VINTNSLSLLTQNNLNK SQGSLGTAIERLSSGLRINS AKDDAAGQAIANRFTSNING 60
YRF-C   ----- 0

YRF      LTQAARNANDGISLSQTAEGALGEINNNLQRVRDLTVQAQNS SNSASDIDSIQSEVNQRM 120
YRF-NC  LTQAARNANDGISLSQTAEGALGEINNNLQRVRDLTVQAQNS SNSASDIDSIQSEVNQRM 120
YRF-N   LTQAARNANDGISLSQTAEGALGEINNNLQRVRDLTVQAQNS SNSASDIDSIQSEVNQRM 120
YRF-C   ----- 0

YRF      EEINRVTKQTFDNGIKVLDNR TAANA EYAFQVGSQDAQKINIEIGSSAGWNLATAGAGGT 180
YRF-NC  EEINRVTKQTFDNGIKVL SGGGSGGGGSGGGGS ----- 148
YRF-N   EEINRVTKQTFDNGIKVLDNR TAANA EYAFQVGSQDAQKINIEIGSSAGWNLATAGAGGT 180
YRF-C   ----- MCDNR TAANA EYAFQVGSQDAQKINIEIGSSAGWNLATAGAGGT 44
          :

YRF      SSDVVNDSTQISKAKETVVQ T LSGKTEAQINTALTKFTT DVKAATDAAGVVTAKGALTTA 240
YRF-NC  ----- 148
YRF-N   SSDVVNDSTQISKAKETVVQ T LSGKTEAQINTALTKFTT DVKAATDAAGVVTAKGALTTA 240
YRF-C   SSDVVNDSTQISKAKETVVQ T LSGKTEAQINTALTKFTT DVKAATDAAGVVTAKGALTTA 104

YRF      LGLKADADLGTAVSSAAF GTDLSVDQIAGVKSGVYSAAINGANYATAKTEAEVSAAQAGA 300
YRF-NC  ----- 148
YRF-N   LGLKADADLGTAVSSAAF GTDLSVDQIAGVKSGVYSAAINGANYATAKTEAEVSAAQAGA 300
YRF-C   LGLKADADLGTAVSSAAF GTDLSVDQIAGVKSGVYSAAINGANYATAKTEAEVSAAQAGA 164

YRF      KTAGAMVNGNFRSVEAKGFDV LKGNVTGGATGTATGTTPLADIDAALKAVDSQRSSLGAS 360
YRF-NC  ----- VEA KGFV LKGNVTGGATGTATGTTPLADIDAALKAVDSQRSSLGAS 201
YRF-N   KTAGAMVNGNFRS----- 327
YRF-C   KTAGAMVNGNFRSVEAKGFDV LKGNVTGGATGTATGTTPLADIDAALKAVDSQRSSLGAS 224

YRF      QNRFESTITNLNNTVNNLTSARSRIQDADYSTEVS NMSRAQILQQAGTSVLAQANQVPQT 420
YRF-NC  QNRFESTITNLNNTVNNLTSARSRIQDADYSTEVS NMSRAQILQQAGTSVLAQANQVPQT 261
YRF-N   ----- 327
YRF-C   QNRFESTITNLNNTVNNLTSARSRIQDADYSTEVS NMSRAQILQQAGTSVLAQANQVPQT 284

YRF      VL SLLR ASSA HHHHHHHHHH 440
YRF-NC  VL SLLR ASSA HHHHHHHHHH 281
YRF-N   ----- ASSA HHHHHHHHHH 327
YRF-C   VL SLLR ASSA HHHHHHHHHH 304

```

**Figure S1 A multiple alignment of recombinant *Y. ruckeri* flagellin (YRF) and its mutants YRF-N, YRF-C and YRF-NC.** The aa sequences derived from the expression vector are highlighted in green. A GS linker (SGGGSGGGGSGGGGS) inserted in YRF-NC is highlighted in red.

**Table S1 Primers used for real-time PCR analysis of gene expression**

| Gene                           | Forward (5' to 3')             | Reverse (5' to 3')            | Acc. No.     |
|--------------------------------|--------------------------------|-------------------------------|--------------|
| <b>House-keeping gene</b>      |                                |                               |              |
| <b>EF-1<math>\alpha</math></b> | CAAGGATATCCGTCGTGGCA           | ACAGCGAAACGACCAAGAGG          | AF498320     |
| <b>IL-1 Family</b>             |                                |                               |              |
| <b>IL-1<math>\beta</math>1</b> | CCTGGAGCATCATGGCGTG            | GCTGGAGAGTGCTGTGGAAGAACATATAG | AJ278242     |
| <b>IL-1<math>\beta</math>2</b> | GAGCGCAGTGGAAGTGTGG            | AGACAGGTTCAAATGCACTTTATGGT    | AJ245925     |
| <b>IL-1<math>\beta</math>3</b> | CTGAAGGCCGTCACAATCCA           | CTGGTCCTTACAGCGCTCCAA         | AM181685     |
| <b>nIL-1Fm</b>                 | CCCATTCTCGTGACACCAG            | CTGGACGACCTGGAGAGTGACT        | AJ555869     |
| <b>IL-18</b>                   | GAGCAATGCAAAGCAGATGATTG        | CATGTTTTGAGCAGCCAATGTAGTC     | AJ556990     |
| <b>TNF family</b>              |                                |                               |              |
| <b>TNF<math>\alpha</math>1</b> | TGTGTGGGGTCTCTTAATAGCAGGTC     | CCTCAATTCATCCTGCATCGTTGA      | AJ277604     |
| <b>TNF<math>\alpha</math>2</b> | CTGTGTGGCGTTCTCTTAATAGCAGCTT   | CATTCGTCCTGCATCGTTGC          | AJ401377     |
| <b>TNF<math>\alpha</math>3</b> | GCTGCACTCTTCTTTACCAAGAAACAAG   | CCACTGAGGACTTGTATCACCATAGGT   | HE798544     |
| <b>IL-6 family</b>             |                                |                               |              |
| <b>IL-6</b>                    | GGGAGAAAATGATCAAGATGCTCGT      | GCAGACATGCCTCCTTGTGG          | DQ866150     |
| <b>IL-11</b>                   | CTCTCGTGCTATTGGCCCA            | TCTCGAATGCATGTTCTTCAATAGAT    | AJ535687     |
| <b>M17</b>                     | GTGGACCTCTTAAAAACATACAAGCTCAG  | GGATGGTGGCTGTAAGTCTGTCTG      | FM866399     |
| <b>CNTF</b>                    | GCACTTATCTTCTGGAGCTATATAGGGAGA | AACTCCATCAACCTCCTCATTGC       | FM866401     |
| <b>IL-12 family</b>            |                                |                               |              |
| <b>P19</b>                     | ACCTAAGAGCAGATTCAATGCCTTG      | TCTTCCCAGCTTTCACCTTCTG        | KP410548     |
| <b>P28A</b>                    | GCAGCTGCTCAGGAGATATAAGGAGG     | TCTCTCAGGTATGCTGGGTTTTGG      | HG794528     |
| <b>P28B</b>                    | GCAGCTGCTCATGAGATATAAAGAGGA    | GCTGCTCTCTGTTCCACCTTATCCAC    | HG794529     |
| <b>P35A1</b>                   | GGAACACCACATTCAGTGAGAGTGC      | CGTCTGCAACTTGTGAGGAAGGAT      | HE798148     |
| <b>P35A2</b>                   | GGAACACCACATTCAGTGAGAGTGA      | CAACCTGTGAGGAAGACACCCA        | HG917950     |
| <b>P35B1</b>                   | TGCCAAACGCCAAGCTTTATTTTG       | GCTGTTGAGTGCTTTTGGTCTTTGG     | HG917951     |
| <b>P40B1</b>                   | CCCTTCTACATCCGAGAAATAGTGAAAC   | GTTGGTTTTCACTATAAACACCTTTTCTT | HE798149     |
| <b>P40B2</b>                   | CCGTTCTACATACGAGAAATAGTGGAGA   | TCAGAGTCACAGCTTTCCTGG         | HG917952     |
| <b>P40C</b>                    | TTAAAGACAACGGAAAGGAGGAGC       | CCTCCCCTAACCACATTTTTCC        | AJ548830     |
| <b>EBI3</b>                    | ACATCGCCACCTACAGTATGAAAGG      | GGGTCCGGCTTACAATGT            | AJ620467     |
| <b>Chemokines</b>              |                                |                               |              |
| <b>CXCL_F1a</b>                | TCATCTACATGATACAAGGG A         | TCAAGTGCTAGGGGTGGTATG         | DQ191448     |
| <b>CXCL_F1b</b>                | CGTCATCTGCATGATACAAGGGAGAAC    | TCCGGATTTCAAGTGTACAATGAG      | NM_001124562 |
| <b>CXCL_F1c</b>                | GCTGCCTTTGCCCAAAGTG            | CCTGCATTCTTTGGTTGATC          | HE578132     |
| <b>CXCL_F2</b>                 | TCTGTGAGCCAACGATGTTTGTG        | GCACTCCATTCTTAAGGCTAACAATGAA  | BX859166     |
| <b>CXCL_F4</b>                 | TGCCTACTCCTTACAGTGGGTA         | TCCGCTGGTTTTCTTCCA            | HE578134     |
| <b>CXCL_F5</b>                 | TGGGAGTTTGTATACAGCTCAAC        | CTTCTTCCAACGGGGTTTCAAGG       | HE578133     |
| <b>CXCL8</b>                   | AGAGACACTGAGATCATTGCCAC        | CCCTCTTCACTTGTGTTGGC          | AJ310565     |
| <b>CXCL11_L1</b>               | TCTGCTCCTGGCCAATGTTGAAG        | TCCCTTCTCCGTTCTTCAAGT         | AJ417078     |
| <b>CXCL12a</b>                 | GACATACGTTTCTTTCGCACA          | GCTTCTTCACTTGTGAGGGCA         | HE578135     |
| <b>CXCL12b</b>                 | CATGGATGTACCTCCCTCTACG         | CTTCTTCACTTGTGTTAATGGCA       | HE578136     |
| <b>CXCL13</b>                  | CAGGTTTCAACAAGTTGGAGA          | TCCCTTGTGTTACTTTGTAAC         | HE578137     |
| <b>CXCL14</b>                  | TCCCTACAAGCTGAAGCCTAC          | TGCTTATCCTTCCAGATCCG          | HE578138     |
| <b>IFN<math>\gamma</math></b>  |                                |                               |              |
| <b>IFN<math>\gamma</math>1</b> | CAAACCTGAAAGTCCACTATAAGATCTCCA | TCCTGAATTTCCCTTGCATATTT       | AJ616215     |
| <b>IFN<math>\gamma</math>2</b> | CAAACCTGAAAGTCCACTATAAGATCTCCA | GGTCCAGCCTCTCCCTCAC           | FM864345     |

**Table S1. Continued.**

| Gene                                       | Forward (5' to 3')                    | Reverse (5' to 3')            | Acc. No. |
|--------------------------------------------|---------------------------------------|-------------------------------|----------|
| <b>IL-17 family</b>                        |                                       |                               |          |
| <b>IL-17A/F1a</b>                          | CAAACGTACACTTTTTGATGGTGCTG            | GGGACTCATCATAGGTGGTGTGGT      | KJ921977 |
| <b>IL-17A/F1b</b>                          | AGGACCACAACACAGCAACAGA                | CATGTAGGGATTGAGCCTTCAACC      | KJ921978 |
| <b>IL-17A/F2a</b>                          | CACCCTGGACCTGGAAAAGCAC                | GGCCACAGACAGGAAGGAGG          | AJ580842 |
| <b>IL-17A/F2b</b>                          | CGCACCTTCTCCACTCAAG                   | AGTCAATTCTTCTGGCTTTGTGGG      | KJ921979 |
| <b>IL-17A/F3</b>                           | GCAACGTTTCACTCTGAAGAGACAG             | CTGGGGAAGTAGACAAAGGGCATC      | KJ921980 |
| <b>IL-17N</b>                              | ACCCACAGCACAGCAGAGACAGA               | GATGTCATTGTGGCAAACGACTAAC     | KJ921981 |
| <b>IL-17C1</b>                             | CTGGCGGTACAGCATCGATA                  | GAGTTATATCCATAATCTTCGATTCCGGC | FM955455 |
| <b>IL-17C2</b>                             | CTGGCGGTACAGCATCGATA                  | CAGAGTTATATGCATGATGTTGGGC     | FM955456 |
| <b>IL-17D</b>                              | GAAGAAATCCTCGAGCAGATGTTTG             | GGGTCGTGGGAGATCCTGTATG        | AJ580843 |
| <b><math>\gamma</math>-chain cytokines</b> |                                       |                               |          |
| <b>IL-2</b>                                | TGATGTAGAGGATAGTTGCATTGTTGC           | GAAGTGTCCGTTGTGCTGTTCTC       | AM422779 |
| <b>IL-4/13A</b>                            | ACCACCACAAAGTGCAAGGAGTTCT             | CACCTGGTCTTGGCTCTTACAAC       | FN820501 |
| <b>IL-4/13B1</b>                           | GAGATTCATCTACTGCAGAGGATCATGA          | GCAGTTGGAAGGGTGAAGCTTATTGTA   | HG794522 |
| <b>IL-4/13B2</b>                           | GAGACTCATCTATTGCGTATGATCATCG          | TGCAGTTGGTTGGATGAAACTTATTGTA  | HG794523 |
| <b>IL-15</b>                               | TGGAATTGCTTCATAATATTGAGCTGCC          | TGGTAGTTATCTGTGACCGACATGTCCTC | AJ628345 |
| <b>IL-21</b>                               | AAAGTTATCAAAAACCTCAACAACCGAA          | CCAGTCTACTGATGGCCTTTGAAG      | FM883702 |
| <b>Anti-inflammatory cytokines</b>         |                                       |                               |          |
| <b>IL-10A</b>                              | GGATTCTACACCACTTGAAGAGCCC             | GTCGTTGTTGTTCTGTGTTCTGTTGT    | AB118099 |
| <b>IL-10B</b>                              | GGGATTCTAGACCACATCAAGAGTCC            | GATGGGAGATTTAAAGTTGTGTGTTCC   | FR691804 |
| <b>TGF<math>\beta</math>1A</b>             | CTCACATTTTACTGATGTCACCTTCTGT          | GGACAACGCTCCACCTTGTG          | OMY7836  |
| <b>TGF<math>\beta</math>1B</b>             | CATGTCCATCCCCAGAACT                   | GGACAACGTTCCACCTTGTGTT        | FN822750 |
| <b>Other cytokines</b>                     |                                       |                               |          |
| <b>IL-20</b>                               | CAAGAACCTGAGGCAATGTCACTG              | TCTCCTATAGCCTTACTGCTGCCG      | FN386780 |
| <b>IL-22</b>                               | GAAGGAACACGGCTGTGCTATTAAC             | GATCTAGGCGTGCACACAGAAGTC      | AM748538 |
| <b>IL-34</b>                               | AGGCAGAAGACGTAACATGAAACACA            | TCCACCCTCGCCCTCAGCTT          | FN820429 |
| <b>SOCS genes</b>                          |                                       |                               |          |
| <b>CISHa1</b>                              | CATTCTACCTTGATACCTCAGGCTGGT           | CCTGCTGCACCTTCTCCTCC          | AM903340 |
| <b>CISHa2</b>                              | TCTTCTACCTTGATACCTCAGGCTGGT           | CCTTGCCCTTCTGTACCTTCTTGT      | HG003693 |
| <b>CISHb1</b>                              | GAATGATGGTGAGAGAGGAGATTTGTGT          | GACCCCCAGTACCAACCTGAGTT       | FR873795 |
| <b>CISHb2</b>                              | GATCATGGTGAGAGAGGAGGGTCA              | GACCCCCAGTACCAACCTGAGTT       | HG003694 |
| <b>SOCS1A</b>                              | GCTAGGAGTGGAGGAGGCTCACA               | AGAGGCAGGGGAAAGAGTGCTC        | AM748721 |
| <b>SOCS1B</b>                              | AGCTTCTCATCAGGGACAGCA                 | GCCTATGGGATGACTCCACGTAGAA     | KY387584 |
| <b>SOCS2A1</b>                             | CAAAAACAAGACGCGTGGGAGAA               | CGTCGGAATCTACAACCCGTGACA      | AM748722 |
| <b>SOCS2A2</b>                             | CCACTCGAAATAGGACGATTCATTT             | TCATCGGAGTCTACAACCTGCGACT     | KY387585 |
| <b>SOCS2B</b>                              | CTCACCTTCAAGGAGTCAGGCTGGTA            | ACATGCCAGTGGCGTGCTCTATAC      | FR874096 |
| <b>SOCS3A</b>                              | CACAGAGAAACCGTTAAAAGGACTATCC          | AAGGGGCTGCTGCTCATGAC          | AM748723 |
| <b>SOCS3B1</b>                             | CACATGCACACTACCAACAGGTGCTGT           | GGGGCATGTGTGTGCAGCA           | KY387586 |
| <b>SOCS3B2</b>                             | CACGCACACTACCAACAGGTGCTGT             | GGGCGTGTGCGTGCAGTG            | KY387587 |
| <b>SOCS4</b>                               | CGTTGTCTCTCTAAAACCTATTTTTAAAAGCACAGAG | AGGTGGAACGCGCTCCTTG           | KY387588 |
| <b>SOCS5A1</b>                             | GTGTTTATAAAAAGACAAAAGGGTCTTGGTCTC     | GACGTCGTCCCCAGTAACCAT         | KY387589 |
| <b>SOCS5A2</b>                             | CTGGTTTTAAAAGACAAAAGGGGCTTG           | TCTCATTGTCTTTTCTGTCTGTGGTTC   | KY387590 |
| <b>SOCS5B1</b>                             | GCAAGGAATACTGTTTTTTTTAAGCCTCAAG       | GACGTATGGCCTTTTTTCTTCTCTCTC   | AM903341 |
| <b>SOCS5B2</b>                             | GAACAACGAAGTTTTTATGCCCAAGT            | CAGCTTGCTCATGGGACGTCTG        | KY387591 |
| <b>SOCS6A1</b>                             | GTTGAAAAACATACTGTAGAAAGGGATGACA       | TCCTCATGATTGAAGTCGTTGCG       | AM903342 |
| <b>SOCS6A2</b>                             | GTTTTTAACAGAGGATGACAGGGATGACT         | CTTCTCCTCGTGATCAAATCGTTACA    | KY387592 |
| <b>SOCS6B1</b>                             | TGCAGATGTTTCATCTAACGAAAGCAAAG         | TTGGCAGGGGCGGCTACTCT          | KY387593 |
| <b>SOCS6B2</b>                             | GCAGATGGTAATCTAACGAAGGGATGAGT 70      | CCCTCCTTCTCCTTGCCCTTGT        | KY387594 |

**Table S1. Continued.**

| Gene                                 | Forward (5' to 3')            | Reverse (5' to 3')           | Acc. No.     |
|--------------------------------------|-------------------------------|------------------------------|--------------|
| <b>SOCS genes</b>                    |                               |                              |              |
| <b>SOCS7A1</b>                       | GGACCAGGACACAGGGAGCAAAC       | GAAGGCAGGACCGAAGGCCAC        | AM903343     |
| <b>SOCS7A2</b>                       | CAGACTTGGACACAGGGAGCAAACA     | GAAGGCAGGACCGAAGGCCAA        | KY387595     |
| <b>SOCS7B1</b>                       | CGCTGCCCAAACCACTGATCA         | CCAGTTACGTCTGAGACTCCGCCTCTT  | KY387596     |
| <b>SOCS7B2</b>                       | CGCTGCCCAAACCACTGATCA         | CAGTTACGTCTGAGACTCGGCCACTTG  | KY387597     |
| <b>APPs</b>                          |                               |                              |              |
| <b>SAA</b>                           | GGTGAAGCTGCTCAAGGTGCTAAAG     | GCCATTACTGATGACTGTTGCTGC     | AM422447     |
| <b>SAP1</b>                          | GCTGTTATGGTGACCTTCAAGATCTCTC  | GCGTTTGTACAACAACAAATCATTGTC  | X99385       |
| <b>SAP2</b>                          | GGTTGTTATGCTGAACATCAAGATCTCTC | CCACCCTTTGATTGCATACACAGATT   | EZ763346     |
| <b>AMPs</b>                          |                               |                              |              |
| <b>CATH1</b>                         | ACCAGCTCCAAGTCAAGACTTTGAA     | TGTCGGAATCTTCTGCTGCAA        | AY594646     |
| <b>CATH2</b>                         | ACATGGAGGCAGAAGTTCAGAAGA      | GAGCCAAACCCAGGACGAGA         | AY542963     |
| <b>Hepcidin</b>                      | GCTGTTCCCTTCTCCGAGGTGC        | GTGACAGCAGTTGCAGCACCA        | CA369786     |
| <b><math>\beta</math>-defensin 1</b> | GGTTTTCTATTGCTTAATGTTGTGG     | GACACACAGTTAAGTCATGG         | AM282655     |
| <b><math>\beta</math>-defensin 2</b> | GCTGACAGCAGTGCAAGCTGATGACAC   | GCAAAGCACAGCATCTTAATCTGC     | FM212656     |
| <b><math>\beta</math>-defensin 3</b> | GCTTGTGGAATACAAGAGTCATCTGC    | GCATACATTGGCCATGTACATCC      | FM212657     |
| <b><math>\beta</math>-defensin 4</b> | GCAACTCTTCTAAAGAACAGT         | CGTGGGCGACACAGCATACAAATCC    | FM212658     |
| <b>LEAP2A</b>                        | GGTTCCTGGTGTCTGCTGCT          | AGTGGCCACCCCTGCAAAT          | AY362186     |
| <b>LEAP2B</b>                        | TGCACGGTCAAACCCACAGCA         | AGGAATGAACTGCCCCACTGA        | AY362187     |
| <b>Complement genes</b>              |                               |                              |              |
| <b>Bf-1</b>                          | ACAATTGTATCGAAATGGCTGTTACTG   | CCACCGGAGTCACCTTTGC          | AF089861     |
| <b>Bf-2</b>                          | GGCGAATTGTATTGAATTGGCTACTA    | CCACCGGAGTCACCTTTGC          | AF089860     |
| <b>C1r</b>                           | CCTCCCTGAGTGCCACATAATTG       | TTGTCTCTCCATGTTCTATCTGCTGC   | AJ519930     |
| <b>C1 inhibitor</b>                  | AACAGTTGGGTTGCAAAGCAGAC       | GGAACATCGCCACCTGTGC          | AJ519929     |
| <b>C3-3</b>                          | TTGGCTGTGGATTGAGGAGAGTCT      | GGGTTCCAGACACACAGATTCCATG    | U61753       |
| <b>C3-4</b>                          | GGATGACCGATTGCAAAGTTTGG       | GGGTTCCAGACACACAGATTCCATG    | AF271080     |
| <b>C4</b>                            | ACAGACGACCTGGACAAGCTAAAGA     | CATCCCCTGAACACAATGTTGAAAC    | AJ544262     |
| <b>C5</b>                            | GAGGAAGATCAGAGAGGGCATCAC      | CTTTGACGTATTTGTCCACCTGTCC    | AF349001     |
| <b>C6</b>                            | CATCTCCATTTTCAAAGGCAAAATG     | GAGCACACCTTCTGATGCACA        | AJ622903     |
| <b>C7-1</b>                          | CTTCCATACCAATGCCAGCCTTC       | ATCCGACCAATCACAATCACTGTC     | AJ566190     |
| <b>C7-2</b>                          | AAATGCCTTATGAGTGCACGTCTTC     | TTGTCCGTCAACAAGTCTCCCA       | AJ622902     |
| <b>C8<math>\alpha</math></b>         | GAGATGTATGGCAGCTCCAGTTTGA     | CAAATATGGGCAGGGTCTCAAATC     | NM_001124624 |
| <b>C8<math>\beta</math></b>          | GGCTGTTCTCAAAGGCACCA          | GCCTCCGCTGCTAGGTGC           | NM_001124607 |
| <b>C8<math>\gamma</math></b>         | AGCACTACCACACGCCTTAACC        | GGTGAGCTGTCCCTGTTTCTG        | AJ622904     |
| <b>C9</b>                            | GCGCTGGTGGATAAGGTGATAACTC     | GAATGGTTCTGGCTCACTGCT        | NM_001124426 |
| <b>CR1 like</b>                      | CCTACTCCACATGCAAAGATGGTG      | CCTATAACACAACAAAACCAAGTCCACC | NM_001124404 |
| <b>C3aR</b>                          | ATTTAAGAAAGGAAAGCTCAAAGATGG   | GTCAGCTATGGAGAAGGGTATGGA     | AJ616902     |
| <b>C5aR</b>                          | CCATACGCCTGAAATCTAAGTCACTC    | ACCCAGCAGGAAGACCAAGCC        | NM_001124467 |
| <b>Arginase genes</b>                |                               |                              |              |
| <b>Arginase 1a</b>                   | CAGAGGTGGATCGCCTTGAATA        | GCAGACAGCATCCCTGTCTGACA      | KX998965     |
| <b>Arginase 1b</b>                   | AGGTGGATCGCCTTGAATCG          | GCAGACAGCAGCCCTGTCTGACT      | KX998966     |
| <b>Arginase 2a</b>                   | TCCAGAGAGTCATGGAAGTCACTTTCC   | CCATCACTGACAACAACCCTGTGTT    | KX998967     |
| <b>Arginase 2b</b>                   | TCCAGAGAGTCATGGAAGTCTCTTTCCG  | CATCACCGACAACAACCCTGTGTT     | KX998968     |
| <b>TLR5</b>                          |                               |                              |              |
| <b>TLR5S</b>                         | GCGCATCACTTCAGGGGGAT          | GCATTTCACTTGCAGGTAGA         | AB062504     |
| <b>TLR5M</b>                         | GCGCTCATACTTCAGGGGGAT         | GCATTTCACTTGCAGGTATT         | AB091105     |

**Table S2. Fold change of transcript expression of immune-relevant genes in the spleen, liver, gills and skin of fish ip injected with YRF.** The fold change was calculated as the average expression level of YRF injected fish divided by that of time matched controls (N=7). Asterisks indicate significant differences (One-way-ANOVA with Bonferroni correction) between YRF injected fish and controls, as follows; \* =  $p < 0.05$ , \*\* =  $p < 0.01$  and \*\*\* =  $p < 0.001$ .

| Tissue<br>Time      | Spleen    |          | Liver      |          | Gills    |         | Skin      |         |
|---------------------|-----------|----------|------------|----------|----------|---------|-----------|---------|
|                     | 6h        | 24h      | 6h         | 24h      | 6h       | 24h     | 6h        | 24h     |
| <b>IL-1 Family</b>  |           |          |            |          |          |         |           |         |
| <b>IL-1β1</b>       | 138.1***  | 2.3      | 166.2***   | 10.1***  | 47.7***  | 1.9     | 468.9***  | 3.5     |
| <b>IL-1β2</b>       | 3702.6*** | 4.5*     | 186.4***   | 2.7      | 259.7*** | 3.3     | 166.4***  | 3.1     |
| <b>IL-1β3</b>       | 1.3       | 0.6      | 1.8        | 0.8      | 3.6***   | 0.7     | 4.1***    | 1.1     |
| <b>nIL-1Fm</b>      | 5.7***    | 1.1      | 4.3***     | 2.0      | 2.1      | 1.0     | 2.6*      | 1.2     |
| <b>IL-18</b>        | 2.7***    | 1.2      | 1.5        | 4.9***   | 1.2      | 1.2     | 1.2       | 1.5     |
| <b>TNF family</b>   |           |          |            |          |          |         |           |         |
| <b>TNFα1</b>        | 12.8***   | 0.9      | 12.6***    | 1.0      | 10.4***  | 0.7     | 24.3***   | 1.0     |
| <b>TNFα2</b>        | 24.4***   | 2.9      | 272.5***   | 13.8     | 20.8***  | 1.4     | 206.6**** | 3.1     |
| <b>TNFα3</b>        | 1.6       | 0.4      | 73.7***    | 1.5      | 2.4      | 1.7     | 47.7*     | 0.5     |
| <b>IL-6 family</b>  |           |          |            |          |          |         |           |         |
| <b>IL-6</b>         | 999.6***  | 6.2**    | 463.5***   | 7.8**    | 68.0***  | 3.4     | 240.1***  | 7.7***  |
| <b>IL-11</b>        | 92.8***   | 9.7***   | 1766.1***  | 22.3***  | 34.0***  | 4.3*    | 112.8***  | 9.7***  |
| <b>M17</b>          | 14.7***   | 6.0***   | 6.3***     | 2.2      | 7.3***   | 5.4***  | 4.3**     | 3.1     |
| <b>CNTF</b>         | 0.5       | 0.9      | 0.8        | 0.6      | 1.0      | 0.6     | 1.0       | 0.6     |
| <b>IL-12 family</b> |           |          |            |          |          |         |           |         |
| <b>P19</b>          | 10.0***   | 2.4      | 1391.6**** | 64.2***  | 4.0      | 0.4     | 68.7***   | 1.4     |
| <b>P35A1</b>        | 1.1       | 0.9      | 30.9***    | 2.4*     | 1.4      | 1.2     | 40.7***   | 3.9     |
| <b>P35A2</b>        | 51.9***   | 2.1      | 68.3***    | 0.2      | 20.8***  | 1.6     | 270.7***  | 1.1     |
| <b>P35B1</b>        | 2.4       | 0.3      | 9.0        | 0.1      | 1.6      | 0.8     | 13.9      | 0.9     |
| <b>P28A</b>         | 2.3       | 0.9      | ND         | ND       | 13.4     | 1.5     | 7.5       | 0.4     |
| <b>P28B</b>         | 5.9       | 2.0      | ND         | ND       | ND       | ND      | ND        | ND      |
| <b>P40B1</b>        | ND*       | ND       | ND*        | ND       | 2.1      | 0.8     | 3.9       | 0.8     |
| <b>P40B2</b>        | 3.1       | 2.4      | 2.0        | 4.4      | 1.6      | 0.8     | 2.0       | 1.3     |
| <b>P40C</b>         | 1.2       | 0.5      | 2.4        | 1.3      | 2.1      | 0.7     | 1.5       | 0.8     |
| <b>EBI3</b>         | 5.0**     | 0.3      | 1.3        | 0.6      | 1.2      | 1.0     | 0.7       | 0.7     |
| <b>Chemokines</b>   |           |          |            |          |          |         |           |         |
| <b>CXCL F1a</b>     | 22.2      | 103.0    | 1.5        | 1.0      | 0.6      | 0.7     | 1.6       | 0.8     |
| <b>CXCL F1b</b>     | 0.8       | 12.2     | 0.7        | 2.7      | 1.5      | 2.6     | 1.2       | 1.6     |
| <b>CXCL F1c</b>     | 1.1       | 0.4      | 0.8        | 1.2      | 1.1      | 0.2***  | 0.7       | 0.4     |
| <b>CXCL F2</b>      | 1.1       | 0.3      | 2.0        | 0.7      | 1.1      | 0.5     | 0.7       | 0.6     |
| <b>CXCL F4</b>      | 22.9***   | 8.0**    | 38.9***    | 32.3***  | 43.4***  | 10.7*** | 47.6***   | 18.9*** |
| <b>CXCL F5</b>      | 7.4***    | 2.2      | 6.5***     | 1.1      | 1.6      | 1.2     | 4.6***    | 1.9     |
| <b>CXCL8</b>        | 344.1***  | 14.0***  | 82.9***    | 13.3***  | 11.2***  | 1.5     | 120.8***  | 3.0     |
| <b>CXCL11 L1</b>    | 1.2       | 0.5      | 1.2        | 1.4      | 0.7      | 0.4     | 1.6       | 0.3     |
| <b>CXCL12a</b>      | 0.9       | 0.4      | 1.8        | 0.4      | 0.8      | 1.6     | 0.9       | 1.5     |
| <b>CXCL12b</b>      | 0.8       | 0.4      | 0.7        | 1.2      | 0.8      | 1.7     | 0.5       | 0.8     |
| <b>CXCL13</b>       | 2.7       | 15.7***  | 0.7        | 99.7***  | 0.8      | 19.0*** | 0.5       | 12.6**  |
| <b>CXCL14</b>       | 1.6       | 0.7      | 0.8        | 0.6      | 1.0      | 1.5     | 0.9       | 1.8     |
| <b>IFNγ</b>         |           |          |            |          |          |         |           |         |
| <b>IFNγ1</b>        | 1.3       | 0.7      | 1.0        | 3.8      | 0.3      | 0.9     | 0.2       | 0.4     |
| <b>IFNγ2</b>        | 1.0       | 1.9      | 1.3        | 1.3      | 0.4      | 0.8     | 0.5       | 0.5     |
| <b>IL-17 family</b> |           |          |            |          |          |         |           |         |
| <b>IL-17A/F1a</b>   | 364.5***  | 233.0*** | 17.7***    | 29.3***  | 0.5      | 0.3     | 0.5       | 0.9     |
| <b>IL-17A/F1b</b>   | ND        | 17.5     | ND         | ND       | 1.2      | 0.6     | 0.3       | 0.6     |
| <b>IL-17A/F2a</b>   | 0.6       | 0.7      | 1.9        | 11.4***  | 0.4      | 0.5     | 0.2       | 0.4     |
| <b>IL-17A/F2b</b>   | 0.8       | 1.1      | 2.0        | 2.2      | 0.9      | 1.0     | 0.5       | 0.9     |
| <b>IL-17A/F3</b>    | 0.6       | 1.2      | 1.6        | 0.6      | 0.7      | 1.1     | 0.4       | 0.7     |
| <b>IL-17N</b>       | 1.9       | 1.6      | 1.1        | 1.2      | 2.2      | 1.0     | 0.9       | 0.8     |
| <b>IL-17C1</b>      | 1.9       | 4.1      | 4967.4***  | 718.4*** | 7.4***   | 0.5     | 21.0***   | 0.8     |
| <b>IL-17C2</b>      | 3.6       | 4.1      | 130.5***   | 11.7***  | 3.4      | 0.6     | 7.8***    | 4.2     |
| <b>IL-17D</b>       | 0.9       | 0.4      | 0.4        | 0.6      | 1.0      | 0.8     | 0.6       | 0.4     |

Table S2. Continued.

| Tissue<br>Time                             | Spleen  |         | Liver    |           | Gills  |         | Skin    |          |
|--------------------------------------------|---------|---------|----------|-----------|--------|---------|---------|----------|
|                                            | 6h      | 24h     | 6h       | 24h       | 6h     | 24h     | 6h      | 24h      |
| <b><math>\gamma</math>-chain cytokines</b> |         |         |          |           |        |         |         |          |
| IL-2                                       | 1.1     | 0.7     | 1.2      | 1.1       | 1.0    | 0.6     | 1.0     | 1.1      |
| IL-4/13A                                   | 0.9     | 1.1     | 0.7      | 4.6**     | 0.9    | 1.5     | 1.1     | 0.8      |
| IL-4/13B1                                  | 0.1     | 3.5     | 0.4      | 13.1***   | 0.3    | 2.2     | 0.7     | 0.9      |
| IL-4/13B2                                  | 1.2     | 1.6     | 0.8      | 1.1       | 1.2    | 1.0     | 1.2     | 0.6      |
| IL-15                                      | 1.0     | 0.6     | 2.7***   | 8.4***    | 2.4*   | 0.7     | 1.2     | 1.0      |
| IL-21                                      | 1.6     | 0.9     | 1.7      | 1.4       | 1.5    | 0.8     | 0.9     | 0.9      |
| <b>Anti-inflammatory cytokines</b>         |         |         |          |           |        |         |         |          |
| IL-10A                                     | 4.3     | 7.9     | 5.5      | 0.4       | 0.6    | 1.8     | 1.7     | 1.4      |
| IL-10B                                     | 0.9     | 1.1     | 5.9      | 0.7       | 1.5    | 1.0     | 1.4     | 1.4      |
| TGFB1A                                     | 1.6     | 1.4     | 1.6      | 3.3***    | 1.1    | 1.4     | 0.9     | 1.2      |
| TGFB1B                                     | 1.7     | 1.3     | 22.8***  | 0.4       | 2.0    | 1.4     | 1.6     | 0.8      |
| <b>Other cytokines</b>                     |         |         |          |           |        |         |         |          |
| IL-20                                      | 6.5     | 1.2     | 2.0      | 2.1       | 1.0    | 1.8     | 1.0     | 1.1      |
| IL-22                                      | 8.9**   | 3.3     | 112.1*** | 12.5***   | 6.5*   | 0.6     | 68.6*** | 1.6      |
| IL-34                                      | 2.9***  | 1.0     | 18.7***  | 0.7       | 1.7    | 1.1     | 3.4***  | 1.5      |
| <b>SOCS genes</b>                          |         |         |          |           |        |         |         |          |
| CISHa1                                     | 1.4     | 3.3     | 8.0***   | 0.2***    | 2.4    | 0.8     | 4.4**   | 1.0      |
| CISHa2                                     | 5.4*    | 2.2     | 19.6***  | 0.2**     | 6.6**  | 1.0     | 8.3***  | 0.9      |
| CISHb1                                     | 1.9     | 2.5     | 1.4      | 0.8       | 1.2    | 0.6     | 1.2     | 0.8      |
| CISHb2                                     | 2.8     | 2.1     | 0.9      | 1.0       | 1.4    | 1.0     | 1.8     | 1.0      |
| SOCS1A                                     | 3.6**   | 1.7     | 22.2***  | 1.4       | 3.0*   | 1.2     | 3.1**   | 1.3      |
| SOCS1B                                     | 1.2     | 1.4     | 0.5      | 2.8       | 0.8    | 1.2     | 0.9     | 1.3      |
| SOCS2A1                                    | 2.4     | 3.7     | 1.1      | 0.3       | 1.3    | 1.8     | 1.0     | 1.3      |
| SOCS2A2                                    | 0.6     | 0.5     | 3.3      | 0.2       | 1.4    | 1.2     | 0.7     | 0.8      |
| SOCS2B                                     | 1.0     | 0.2     | 2.5      | 0.4       | 1.2    | 0.3     | 1.1     | 0.3      |
| SOCS3A                                     | 11.0*** | 6.0**   | 38.6***  | 3.8       | 5.7*** | 2.4     | 3.6*    | 2.6      |
| SOCS3B1                                    | 1.5     | 1.5     | 1.7      | 3.8       | 1.0    | 2.5     | 2.2     | 3.4      |
| SOCS3B2                                    | 7.0*    | 6.2     | 2.6      | 16.2**    | 2.5    | 4.7     | 2.5     | 6.9      |
| SOCS4                                      | 1.3     | 0.3     | 0.3      | 0.5       | 1.8    | 1.7     | 0.8     | 1.3      |
| SOCS5A1                                    | 1.2     | 1.5     | 0.1      | 2.3       | 1.2    | 1.8     | 0.8     | 2.4      |
| SOCS5A2                                    | 0.6     | 1.3     | 0.1      | 0.9       | 0.9    | 1.6     | 1.0     | 1.6      |
| SOCS5B1                                    | 1.0     | 1.0     | 0.4      | 1.1       | 1.0    | 1.4     | 1.4     | 1.3      |
| SOCS5B2                                    | 1.4     | 1.1     | 0.7      | 1.4       | 2.8    | 1.7     | 2.8     | 2.4      |
| SOCS6A1                                    | 0.7     | 1.0     | 0.4*     | 1.3       | 0.7    | 1.3     | 0.6     | 1.1      |
| SOCS6A2                                    | 1.0     | 1.1     | 0.4***   | 1.3       | 1.2    | 1.0     | 0.6     | 1.0      |
| SOCS6B1                                    | 1.0     | 1.0     | 0.4      | 0.8       | 1.2    | 1.4     | 0.5     | 0.9      |
| SOCS6B2                                    | 0.8     | 1.1     | 0.3**    | 1.5       | 1.0    | 1.3     | 0.9     | 1.1      |
| SOCS7A1                                    | 1.4     | 1.0     | 0.6      | 1.2       | 1.7    | 1.3     | 1.6     | 1.3      |
| SOCS7A2                                    | 0.9     | 0.6     | 1.5      | 0.9       | 1.6    | 1.0     | 0.9     | 1.2      |
| SOCS7B1                                    | 3.0     | 2.0     | 1.5      | 1.6       | 1.8    | 2.5     | 0.7     | 1.4      |
| SOCS7B2                                    | 1.6     | 1.4     | 2.2***   | 1.7*      | 1.1    | 1.4     | 0.7     | 1.2      |
| <b>APPs</b>                                |         |         |          |           |        |         |         |          |
| SAA                                        | 31.1*** | 15.9*** | 225.8*** | 5450.6*** | 2.8    | 26.2*** | 8.7**   | 111.8*** |
| SAP1                                       | 3.9*    | 3.2     | 1.4      | 0.6       | 0.4    | 3.5     | 0.6     | 0.8      |
| SAP2                                       | 1.8     | 1.8     | 0.9      | 1.7       | 1.1    | 0.9     | 0.9     | 2.1      |

Table S2. Continued.

| Tissue<br>Time          | Spleen   |         | Liver     |             | Gills   |          | Skin      |           |
|-------------------------|----------|---------|-----------|-------------|---------|----------|-----------|-----------|
|                         | 6h       | 24h     | 6h        | 24h         | 6h      | 24h      | 6h        | 24h       |
| <b>AMPs</b>             |          |         |           |             |         |          |           |           |
| <b>CATH1</b>            | 39.0***  | 5.7     | 5.2       | 45.0***     | 4.3     | 10.4     | 29.0***   | 60.6***   |
| <b>CATH2</b>            | 69.0***  | 26.6*** | 745.0***  | 14687.1**** | 19.9*** | 137.5*** | 10.7***   | 128.5***  |
| <b>Hepcidin</b>         | 278.6*** | 75.4*** | 11.9***   | 235.2***    | 65.4*** | 309.5*** | 66.0***   | 1891.5*** |
| <b>β-defensin 1</b>     | ND       | 0.0     | ND        | ND          | 1.8     | 0.3      | 0.9       | 1.2       |
| <b>β-defensin 2</b>     | 3.1      | 5.4     | 1.5       | 0.8         | 0.8     | 0.7      | 0.3       | 1.2       |
| <b>β-defensin 3</b>     | 4.4      | 1.3     | 0.9       | 1.8         | 7.6     | 3.3      | 3.0       | 1.3       |
| <b>β-defensin 4</b>     | 0.9      | 3.1**   | 0.5       | 2.7*        | 0.9     | 1.5      | 0.7       | 1.1       |
| <b>LEAP2A</b>           | 0.6      | 1.3     | 2.6       | 0.04***     | 0.5     | 0.8      | 1.3       | 1.1       |
| <b>LEAP2B</b>           | 0.8      | 0.2     | 1.2       | 0.05***     | 1.3     | 0.6      | 0.7       | 0.6       |
| <b>Complement genes</b> |          |         |           |             |         |          |           |           |
| <b>Bf-1</b>             | 13.6***  | 4.3     | 1.6       | 1.8         | 0.8     | 1.3      | 0.7       | 0.8       |
| <b>Bf-2</b>             | 1.9      | 1.9     | 1.7       | 1.4         | 1.4     | 0.9      | 0.2       | 0.5       |
| <b>C1r</b>              | 4.0**    | 1.0     | 1.1       | 0.7         | 1.4     | 1.3      | 0.8       | 0.8       |
| <b>C1 inhibitor</b>     | 2.8      | 1.1     | 1.0       | 0.7         | 0.8     | 1.2      | 0.8       | 1.3       |
| <b>C4</b>               | 0.8      | 0.9     | 1.2       | 0.9         | 1.2     | 1.9      | 0.6       | 3.2       |
| <b>C5</b>               | 7.8      | 1.4     | 1.3       | 1.3         | 1.1     | 0.7      | 0.2       | 1.2       |
| <b>C6</b>               | 1.3      | 1.3     | 1.1       | 1.4         | 1.5     | 2.2      | 1.7       | 6.6***    |
| <b>C7-1</b>             | 23.1***  | 19.5*** | 25.5***   | 23.2***     | 11.1*** | 12.4***  | 8.7***    | 12.5***   |
| <b>C7-2</b>             | 1.2      | 0.7     | 0.9       | 0.8         | 0.9     | 1.2      | 1.3       | 0.7       |
| <b>C8α</b>              | 5.4      | 1.5     | 0.9       | 0.8         | 1.3     | 0.3      | 0.6       | 0.7       |
| <b>C8β</b>              | 1.9      | 1.0     | 1.3       | 0.6         | 1.2     | 0.9      | 0.7       | 0.8       |
| <b>C8γ</b>              | 0.9      | 0.5     | 1.2       | 0.6         | 1.2     | 1.4      | 1.1       | 0.8       |
| <b>C9</b>               | 1.0      | 1.0     | 1.5       | 1.8         | 0.6     | 0.9      | 0.6       | 0.5       |
| <b>C3-3</b>             | 4.0      | 3.7*    | 1.0       | 1.3         | 0.6     | 2.0      | 0.4       | 1.4       |
| <b>C3-4</b>             | 6.2*     | 2.0     | 1.1       | 0.5         | 1.8     | 0.9      | 0.9       | 0.6       |
| <b>C3aR</b>             | 1.8      | 1.7     | 1.5       | 1.5         | 2.5     | 1.1      | 1.9       | 1.6       |
| <b>C5aR</b>             | 4.6**    | 2.5     | 2.2       | 7.0***      | 2.9     | 5.3**    | 3.6       | 2.9       |
| <b>CR1 like</b>         | 3.8***   | 3.1***  | 1.7       | 4.3***      | 2.7***  | 1.5      | 2.6***    | 2.2**     |
| <b>Arginase genes</b>   |          |         |           |             |         |          |           |           |
| <b>Arginase 1a</b>      | 31.2***  | 11.5*** | 0.8       | 0.4         | 1.2     | 0.9      | 3.3       | 2.0       |
| <b>Arginase 1b</b>      | 2.2      | 1.3     | 0.8       | 0.7         | 0.5     | 1.0      | 3.2       | 1.0       |
| <b>Arginase 2a</b>      | 8.2***   | 3.1**   | 6.0***    | 6.5***      | 1.5     | 1.5      | 4.5***    | 3.5       |
| <b>Arginase 2b</b>      | 16.3***  | 5.0**   | 15.8***   | 18.9***     | 3.6     | 2.6      | 5.8       | 3.6       |
| <b>TLRS</b>             |          |         |           |             |         |          |           |           |
| <b>TLR5S</b>            | 25.2***  | 1.0     | 254.5**** | 23.4***     | 59.4*** |          | 274.4**** | 476.6***  |
| <b>TLR5M</b>            | 1.0      | 0.2     | 2.6       | 0.0         | 0.5     | 0.9      | 0.7       | 1.6       |

Note

ND, not determined due to low expression levels.

ND\*, detectable in YRF injected fish but not detectable in time-matched controls.
